# Supplementary material for: Age-related variation in the anthropometric profiles, body composition and functional capacities of female soccer players
Source: PeerJ. 2025 Oct 30;13:e20096. doi: 10.7717/peerj.20096 (PMC12579847; doi:10.7717/peerj.20096)
Supplement: Supplemental Information 1 [file peerj-13-20096-s001.xlsx]

## Sheet: Sheet1
i	age	exp	sex	training hour	stature	sitting s	trunk h	low limb lenght	arm rel	arm stret	hip	thigh	calf	humeral	femoral	bic_SK	tri_SK	sub_SK	supil_SK	supspin_SK	abs_SK	thigh_SK	m_calf_SK	l_calf_SK	tot_SK	R	Xc	PhA	BM	D (kg/L)	BF (%)	FM	FFM	TBW (kg)	ECW (kg)	ICW (kg)	TUA	UMA	UFA	UFI	TCA	CMA	CFA	CFI	CMJ (cm)	30-15 IFT (Km/h)
29	13.1425	6.14247	0	6	154.1	119.3	79.3	74.8	22.2	23.6	63.3	45.5	31.3	6	8.9	4	12	5.33333	10.5	5	9	12.8333	9	10	77.6667	590.75	56.9	5.45	43.883	1.0497	21.2	9.288	34.595	25.0195	11.8671	13.1524	39.219	27.03	12.189	31.0794	77.9613	64.5125	13.4488	17.2506	23.8	16
30	13.4192	8.41918	0	6	164.4	127.6	87.6	76.8	29.1	29.1	71.4	52.7	36.8	6	10.3	10.8333	14.5	12.3333	14.3333	11	13	19.8333	14	16	125.833	496.85	53.65	6.05	62.703	1.0353	27.2	17.072	45.631	35.0342	15.5568	19.4774	67.3871	47.9409	19.4462	28.8575	107.767	83.5465	24.2206	22.475	24.2	15.5
32	13.4877	1.48767	0	6	157	123.9	83.9	73.1	27.5	27.8	73.1	55.7	38	6.2	9.3	6.66667	11	9	11.6667	8	9	11	9	10	85.3333	487.85	54.4	6.3	63.543	1.0424	24.2	15.395	48.148	34.6026	15.1465	19.4561	60.1805	46.0058	14.1747	23.5536	114.91	98.4461	16.4638	14.3276	27.3	18
27	13.7479	1.74795	0	6	154.4	121.2	81.2	73.2	21.1	21.9	64.7	46.5	31.4	5.3	8.5	4.5	8	5	7.33333	3.83333	5.66667	11	5.16667	7	57.5	509.45	47	5.15	44.281	1.0608	16.6	7.354	36.972	26.4591	12.8197	13.6394	35.4287	27.4914	7.93735	22.4037	78.4603	70.5583	7.90201	10.0714	28.4
26	13.7562	3.75616	0	6	171.5	127.1	87.1	84.4	27.6	28.4	73.3	53.7	35	6.1	9.3	10	15	8.66667	16	10.3333	12	17	15	14	118	591.05	55.45	5.3	64.481	1.0308	29.1	18.786	45.695	34.8149	15.6876	19.1273	60.619	41.6861	18.9329	31.2326	97.4825	72.9996	24.4829	25.1151	21.5	15.5
28	13.7562	6.75616	0	6	160.2	124.4	84.4	75.8	24.5	26.7	66.3	50.6	34.6	6	9.5	8.66667	16.1667	7.16667	14.1667	9	10.8333	20	12	14	112	537.05	54.15	5.6	54.769	1.0423	24.2	13.273	41.496	30.6905	14.0066	16.6839	47.7664	30.015	17.7514	37.163	95.267	75.638	19.629	20.6042	21.5	16
33	13.9397	2.93973	0	6	160.2	123.1	83.1	77.1	26.6	27.2	66.9	49.5	35.4	5.9	9	7.5	15	10	8.16667	6.83333	6.83333	13.8333	11.1667	9	88.3333	546.7	63.35	6.5	55.256	1.0439	23.6	13.03	42.226	30.7136	13.6091	17.1045	56.3059	38.123	18.1829	32.293	99.7234	80.9377	18.7857	18.8378	24.4	16.5
40	14.263	5.26301	0	8	162	125.5	85.5	76.5	28.5	28.9	68.4	53.7	36.8	6.1	9.4	6.66667	15.8333	11.8333	11	8	8	17	11	15	104.333	529.7	58.65	6.3	61.354	1.0341	27.7	17.023	44.331	33.5686	14.7807	18.7878	64.6369	44.0433	20.5936	31.8604	107.767	88.4774	19.2897	17.8994	24.2	16.5
34	14.3781	4.37808	0	6	155.5	120.7	80.7	74.8	23	23.8	64.4	48.9	33.6	6.3	9.3	7	12.8333	7	11	7	8	19	12	13	96.8333	597.25	53.6	5	49.173	1.0481	21.8	10.737	38.435	27.1124	12.7574	14.3549	42.0965	28.6317	13.4648	31.9856	89.8399	70.8108	19.029	21.1811	26.4	17.5
45	14.3863	4.3863	0	8	159	123	83	76	25.2	27	68.3	48.1	34.9	5.9	8.4	8	12.8333	8.16667	17	13.6667	13	16	12	12.8333	113.5	577.1	72.35	7	53.99	1.0453	23	12.425	41.565	29.6145	12.9417	16.6728	50.5349	35.6584	14.8765	29.438	96.9262	77.1172	19.809	20.4372	25.6	17
37	14.6	7.6	0	8	165.8	125.2	85.2	80.6	31.8	32.2	72	54.6	37.6	6.1	9.1	13.6667	17	10	14	12	11	19	11	12	119.667	586.7	67.65	6.5	63.442	1.0293	29.8	18.895	44.547	33.8478	14.6512	19.1966	80.472	55.7118	24.7602	30.7687	112.504	92.7739	19.7297	17.5369	27.3	17
31	14.6329	6.63288	0	6	161.4	124.7	84.7	76.7	22	22.8	64.8	53.4	34.1	6.1	9.2	7.16667	12	7.66667	10.3333	7	7.5	15.1667	11	10.1667	88	566.2	65.9	6.55	53.288	1.0454	23	12.232	41.056	29.7735	13.2488	16.5247	38.5155	26.4465	12.069	31.3355	92.5336	74.7289	17.8047	19.2413	25	18
36	14.811	7.81096	0	6	163.2	124.6	84.6	78.6	25.5	27.6	66.6	47.5	31.3	5.7	8.9	7.16667	13.1667	9.16667	14.1667	9.16667	9.83333	15.1667	11	10.6667	99.5	695.9	67.45	5.5	52.814	1.0398	25.3	13.364	39.45	28.0826	12.7606	15.322	51.7453	36.3194	15.4259	29.8113	77.9613	61.6966	16.2647	20.8625	20.7	18
35	14.9178	4.91781	0	6	156.6	122.2	82.2	74.4	22.7	23.4	65.6	45.8	32.4	5.5	8.7	5.5	10	7.16667	10	5.5	8	13	9	9.33333	77.5	624.05	61.1	5.5	47.373	1.0452	23.1	10.923	36.45	26.1876	12.1649	14.0227	41.0055	30.4409	10.5646	25.7639	83.5373	69.5935	13.9438	16.6917	25.3	17.5
39	15.6301	9.63014	0	8	168.3	131.1	91.1	77.2	26	27.1	69.7	50.6	36.9	5.9	8.3	9	15	8.33333	12	10	10	18	14	17	113.333	567.35	62.3	6.1	59.885	1.0426	24.1	14.439	45.446	33.0771	14.6582	18.4189	53.7944	36.0616	17.7329	32.9641	108.354	84.063	24.2906	22.4179	26.3	18
43	16.1616	5.16164	0	8	166.5	129.6	89.6	76.9	26.3	27.1	67.1	50.3	29.6	6.4	9.3	8	11	8.83333	10	9	9	14.5	8	10	88.3333	526.65	60.5	6.5	58.813	1.0534	19.6	11.537	47.276	33.1936	14.6927	18.5009	55.043	41.5283	13.5147	24.5529	69.7227	58.3853	11.3373	16.2606
56	16.2466	10.2466	0	8	172.5	130.6	90.6	81.9	24.3	25.4	63.8	47.5	32.9	5.7	9.1	7	16.6667	8	12	8	13.3333	22	15	17.3333	119.333	710.55	73.5	5.9	52.502	1.0603	16.8	8.826	43.675	28.6654	12.9791	15.6863	46.9897	28.9214	18.0683	38.4517	86.1355	63.2277	22.9079	26.5951	22.7	17
38	16.263	4.26301	0	8	160.4	128.7	88.7	71.7	22.6	23.8	62.7	48.3	34	5.4	8.7	5	10	9.16667	11.8333	8	8	16.3333	8	10	86.3333	585.75	62.75	6	50.262	1.0629	15.7	7.915	42.347	28.2019	12.8381	15.3638	40.645	30.1304	10.5146	25.8693	91.9916	78.8943	13.0973	14.2375		16
41	16.3205	4.32055	0	8	158	122.2	82.2	75.8	24.8	26.3	65	51.3	34.4	5.7	8.9	4.83333	12	8	8	4.16667	7	17	13	13	87	570.5	66.75	6.5	52.548	1.0522	20.1	10.571	41.978	29.0498	12.9032	16.1466	48.9434	35.1943	13.749	28.0917	94.1689	73.1362	21.0327	22.3351	31.1	19
47	16.4301	5.43014	0	8	164.7	127.5	87.5	77.2	26.2	27.7	68.8	54.1	36.5	6.1	9.4	8.33333	18.6667	10.3333	12	7	16	19.6667	14	17.3333	123.333	635	73.5	6.5	58.323	1.0418	24.5	14.279	44.045	31.0704	13.5499	17.5205	54.6252	32.9085	21.7167	39.7557	106.017	82.0066	24.0106	22.6479	30.9	18
42	16.5479	6.54795	0	8	172.4	131.3	91.3	81.1	23.8	24.9	66.2	49.9	36.7	6.1	9.3	4	11	6.5	8.66667	5.83333	6.5	11.8333	6	8	68.3333	609.2	72.4	6.65	59.004	1.0561	18.5	10.938	48.066	32.5162	14.219	18.2972	45.0759	32.9362	12.1397	26.9316	107.182	96.4549	10.7273	10.0084	37.9
46	16.6247	12.6247	0	8	159.1	122.3	82.3	76.8	24.3	25.7	65.7	47.1	31.6	5.6	8.2	7	10.3333	8	15	6.33333	11	14	10.6667	10.1667	92.5	680	76.1	6.3	48.533	1.049	21.5	10.418	38.116	26.23	11.7858	14.4442	46.9897	35.2734	11.7164	24.9339	79.4629	63.5032	15.9597	20.0845	27.7	18
44	16.6493	6.64932	0	8	168.3	129.9	89.9	78.4	28.8	29.4	69.5	55.3	36.8	5.7	8.9	6.5	11	10	14.1667	8	7.83333	18	10	8.33333	93.8333	546.45	66.05	6.8	63.763	1.0552	18.9	12.037	51.726	34.9425	15.1008	19.8416	66.0048	51.1151	14.8897	22.5585	107.767	90.1525	17.6146	16.3451	35.3	17.5
49	16.8548	10.8548	0	8	163.6	126.4	86.4	77.2	26.7	27.5	69.4	59.3	40.4	6.4	10.7	7	20	10	13	10	13.3333	24.6667	20	18.6667	136.667	476.75	52.1	6.1	65.028	1.0389	25.7	16.703	48.324	36.2692	16.0076	20.2616	56.73	33.1716	23.5584	41.5272	129.883	92.6249	37.2584	28.6861	29.2	17
51	17.137	11.137	0	8	169.7	130	90	79.7	27.4	27.9	69.9	52.8	36.2	5.6	9.6	6	19.3333	10.6667	18.3333	13.6667	16.5	18.6667	18	19.6667	140.833	557.7	67.65	6.9	60.164	1.0448	23.2	13.964	46.2	33.5184	14.614	18.9044	59.7436	36.1926	23.551	39.4201	104.282	74.2463	30.0353	28.8021		16.5
52	17.4137	11.4137	0	8	157.5	125.4	85.4	72.1	27.8	28.6	71.8	56.3	37.9	6	10.5	8.66667	15.3333	11.3333	13.6667	10	17	20	12	15.6667	123.667	484.25	61.35	7.1	62.549	1.0349	27.4	17.133	45.417	34.3565	14.7662	19.5903	61.5007	42.0339	19.4668	31.6529	114.306	92.6969	21.609	18.9045	24.2
53	17.4137	11.4137	0	8	163.2	127.7	87.7	75.5	26.7	27	73.1	55.9	40.8	5.8	10.7	7.16667	14.3333	10	16	13	17	22.6667	13.6667	14.6667	128.5	490.95	59.15	6.8	64.834	1.045	23.1	14.984	49.849	35.8259	15.4984	20.3275	56.73	39.2086	17.5214	30.8857	132.468	106.055	26.4131	19.9392	24.7
54	17.4411	7.4411	0	8	166.2	126.7	86.7	79.5	25.5	26.7	69.7	54.3	35.9	5.6	9.7	7.33333	18.6667	11	16.6667	10.6667	15.3333	14.3333	17.6667	21	132.667	541.4	59.15	6.1	61.778	1.0447	23.3	14.367	47.411	34.0195	15.0329	18.9866	51.7453	30.682	21.0633	40.7058	102.56	73.3	29.2604	28.5299	26.6	18
48	17.7671	7.76712	0	8	158.1	124	84	74.1	23.5	24	65.2	46.6	32.2	5.5	8.6	5.33333	10	8	15.6667	5.33333	12.6667	15.3333	8.66667	9	90	560.35	65.95	6.6	47.04	1.0599	17	7.99	39.05	27.0948	12.2805	14.8143	43.9467	32.9821	10.9646	24.9498	82.5092	69.1458	13.3634	16.1963	29.2
55	17.9726	4.9726	0	8	159.4	127.1	87.1	72.3	25.3	25.7	63.6	49	34.5	5.7	9.5	4.66667	13.6667	7	8	6.33333	9	18.6667	15.6667	14.6667	97.6667	557.95	67.1	6.85	51.188	1.0652	14.8	7.588	43.6	28.8734	12.8565	16.0169	50.9368	35.1154	15.8214	31.0608	94.7172	69.6199	25.0973	26.4971	35.5
50	18.874	6.87397	0	8	167.4	129.3	89.3	78.1	24.9	26.8	66.8	58.3	36.2	5.8	9	4	17.3333	10	12.6667	4	8	21.3333	15.6667	24	117	568.4	66.85	6.6	58.846	1.0494	21.3	12.535	46.311	32.5554	14.2791	18.2763	49.3389	30.1186	19.2203	38.9557	104.282	77.8526	26.429	25.3438
5	19.937	7.93699	0	12	167.6	129.5	89.5	78.1	27	27.9	71.4	53.7	34.7	5.8	8.9	9	13.3333	12	12.3333	8.5	12	18	13	12.6667	110.833	569.2	62.3	6.1	63.409	1.0433	23.8	15.106	48.303	34.3216	15.0514	19.2702	58.012	41.4083	16.6037	28.6212	95.8185	74.5908	21.2277	22.154	27	18
6	20.4274	16.4274	0	12	160	123.1	83.1	76.9	27.6	29	74.4	55	34.5	5.7	10.4	4.66667	14.8333	10	12.8333	8	8.16667	23	10.6667	16	108.167	473.75	65.8	7.85	59.667	1.0549	19	11.34	48.327	33.795	14.4631	19.3319	60.619	41.8771	18.7419	30.9176	94.7172	77.2108	17.5064	18.4828	31.6	18.5
17	21.3699	10.3699	0	12	164.1	127.1	87.1	77	23.6	25.1	70.6	48.7	35	5.6	10.3	4.16667	10.8333	7.66667	8	4.5	8	14	8.33333	9	74.5	552.9	65.5	6.65	53.982	1.0598	17	9.195	44.787	30.5665	13.5802	16.9862	44.3215	32.4599	11.8616	26.7626	97.4825	83.4446	14.0379	14.4005	30.6	19
2	21.4959	12.4959	0	12	163.7	128.2	88.2	75.5	27.3	28.7	71.6	54.3	36.7	5.7	8.8	9	14	11	8.16667	7	10	20	12	14	105.167	505.15	59.35	6.6	62.033	1.0453	23	14.254	47.779	34.5133	15.084	19.4293	59.3083	41.7377	17.5706	29.6259	107.182	86.2932	20.889	19.4893	28.6
21	21.4986	13.4986	0	12	178.2	134.3	94.3	83.9	26.5	27.8	72.6	53	35	6.4	9.7	3.83333	11.6667	8	11	6	7	14	7	9	77.5	545.3	72.45	7.5	65.737	1.0549	19	12.514	53.223	36.9505	15.7603	21.1901	55.8833	41.494	14.3893	25.7489	97.4825	85.6173	11.8652	12.1716
23	21.6493	17.6493	0	12	170.6	131.8	91.8	78.8	26.1	28.3	67	55.3	37.9	6.1	10.4	8	11.5	6.16667	11	5.16667	9	17	11	11	89.8333	510.5	65	7.15	61.709	1.0486	21.6	13.332	48.378	35.1612	15.2382	19.923	54.209	40.2402	13.9688	25.7684	114.306	94.4113	19.8947	17.4048	35.1	19.5
12	21.8356	16.8356	0	12	174	129	89	85	27.2	28.3	78.8	55.5	38.1	/	/	9	14	11	14.3333	7.33333	13.6667	18	11.3333	11	109.667	533.9	51.7	5.5	67.953	1.0451	23.1	15.67	52.283	37.5058	16.8416	20.6642	58.8746	41.374	17.5006	29.7252	115.516	94.9344	20.5812	17.8168	29.3	18.5
1	22.263	17.263	0	12	154.5	123.1	83.1	71.4	24.6	26.7	66.6	52.2	33.6	5.9	8.3	3	9.83333	7	8.33333	4.83333	7	12.8333	6	7.66667	66.5	511.85	76.05	8.4	51.766	1.0631	15.7	8.105	43.662	29.3098	12.6015	16.7083	48.1571	36.8216	11.3356	23.5387	89.8399	80.0426	9.79726	10.9052	38.7	19.5
4	22.2904	14.2904	0	12	160	126.4	86.4	73.6	27.9	29.3	73.6	53.9	35.9	5.6	10.2	6.33333	12	10.6667	12.5	8.83333	10	18	10	13	101.333	501.1	65.35	7.4	60.718	1.0488	21.5	13.079	47.639	33.6245	14.4504	19.1741	61.944	46.3349	15.609	25.1986	102.56	85.3957	17.1646	16.7361	33.7	18
10	22.3068	11.3068	0	12	166.7	125.7	85.7	81	26.5	28.1	73.8	52.8	35.2	6.3	9	5.66667	13.8333	7.33333	9.83333	5.33333	8	16.6667	9	12	87.6667	481.9	63.4	7.45	59.537	1.0529	19.9	11.818	47.719	34.4525	14.9417	19.5108	55.8833	39.0571	16.8262	30.1096	98.5998	83.3959	15.2038	15.4197	30.3	19
11	22.4247	14.4247	0	12	167.6	127.9	87.9	79.7	27.5	28.8	70.6	55	36.6	6.1	9.2	5	11.6667	7.5	12.3333	7.33333	11	16	6.33333	8	85.1667	543.45	78.55	8.15	63.137	1.0538	19.4	12.279	50.857	34.6729	14.5859	20.087	60.1805	45.2079	14.9727	24.8796	106.599	95.3239	11.275	10.577	31.8	18.5
7	22.5616	17.5616	0	12	164.6	130.5	90.5	74.1	26.2	28.2	70.4	52.8	33.3	5.7	9.1	4.5	12.8333	8	9.5	6	9.66667	16.8333	9.83333	11	88.1667	503.95	64.5	7.2	57.476	1.0645	15.1	8.675	48.801	32.8978	14.3556	18.5421	54.6252	39.107	15.5182	28.4084	88.2427	72.6297	15.6131	17.6933	30.9	19
3	22.8301	10.8301	0	12	173.6	130.5	90.5	83.1	30.2	31.3	78	59.7	41.7	6.3	9.8	12.3333	15.8333	12.5	14.8333	8.83333	11.1667	22	11	14	122.5	510.45	65.65	7.3	77.225	1.0469	22.3	17.23	59.996	41.5304	17.3881	24.1423	72.5779	50.6385	21.9394	30.2287	138.377	116.392	21.9847	15.8876	28.8
14	23.8	12.8	0	12	160.1	127.1	87.1	73	29.5	30.8	74.8	59.2	36.6	6.1	9.3	8.16667	9.66667	10.6667	15.6667	11	10	18	11.1667	14	108.333	468.5	60.5	7.3	64.011	1.0352	27.3	17.458	46.554	35.5988	15.2595	20.3393	69.2524	55.7279	13.5244	19.5292	106.599	87.1432	19.4557	18.2513	30.2	18.5
8	24.3534	16.3534	0	12	165.1	129.6	89.6	75.5	26.8	27.8	69.5	56.5	35.9	5.7	9.2	7.5	11.8333	8	10.5	5	9	18.6667	10	15	95.5	479.55	62.4	7.35	61.318	1.0469	22.3	13.681	47.637	34.9774	15.1136	19.8638	57.1558	42.3989	14.7569	25.8187	102.56	85.3957	17.1646	16.7361	29.1
15	25.0055	17.0055	0	12	167.7	129.5	89.5	78.2	28.1	29.5	74.7	53.6	35.1	6.1	8.9	4.83333	12	9	6	5.83333	7.83333	15	7	8.83333	76.3333	470.95	58.7	7	62.608	1.0493	21.3	13.359	49.249	36.0347	15.6892	20.3455	62.8352	47.1062	15.729	25.0322	98.0403	86.1402	11.9002	12.138	36.1
25	25.2219	9.22192	0	12	176.4	130.8	90.8	85.6	29.8	31.7	76.1	57.4	36.7	6.5	9.9	7.83333	12	11.6667	12.8333	10.8333	11	20	10.3333	11	107.5	432.1	49.2	6.4	72.898	1.0588	17.5	12.773	60.125	42.3943	18.5925	23.8018	70.668	53.919	16.749	23.701	107.182	89.0592	18.123	16.9086	34.6
22	26.5781	11.5781	0	12	169.8	128.8	88.8	81	26	27.9	69.6	49.9	33.4	5.8	8.9	3.5	5.83333	6.16667	5.16667	3	5	11	4	6	49.6667	484.9	63.3	7.4	57.357	1.0647	15	8.615	48.742	33.9631	14.8665	19.0966	53.7944	46.4783	7.31608	13.6001	88.7735	82.2192	6.55434	7.38321	43.1
24	27.8384	22.8384	0	12	172.4	131.2	91.2	81.2	29.1	30.5	75.3	58.5	37.9	5.7	10.5	5.66667	7.66667	9	10.8333	6.83333	9	15.6667	9.66667	9.66667	84	487.2	55.85	6.5	71.579	1.0559	18.6	13.33	58.25	39.7399	17.2178	22.5221	67.3871	56.6937	10.6934	15.8686	114.306	96.7215	17.5844	15.3836	33.3
19	28.1425	22.1425	0	12	157.9	123.7	83.7	74.2	23.5	24.4	65.7	48.5	34.1	5.6	8.7	2.66667	9.66667	6.16667	5	3	5.66667	17	8.66667	8.5	66.3333	554.25	68.75	7	49.381	1.0667	14.2	7.02	42.361	28.0696	12.5004	15.5691	43.9467	33.3223	10.6244	24.1757	92.5336	78.3468	14.1867	15.3315	35.1
16	28.4411	20.4411	0	12	164.4	123.8	83.8	80.6	25	25.8	66.6	46.5	35.1	5.6	8.8	2.66667	8	6.83333	5.5	4	5.83333	10	4.5	6.16667	53.5	545.85	61.8	6.4	55.581	1.0715	12.3	6.846	48.735	31.34	13.9851	17.3549	49.736	40.2386	9.49735	19.0955	98.0403	90.3019	7.73846	7.89314	27.4	18.5
9	28.6219	22.6219	0	12	173.9	130.6	90.6	83.3	26.6	28.1	71.2	56.8	36.3	5.7	8.7	10	18	7.5	14	10.5	12.6667	22	16.1667	15	125.833	556.35	62.25	6.35	65.692	1.0394	25.5	16.727	48.965	36.1769	15.8263	20.3506	56.3059	34.9106	21.3953	37.9984	104.859	77.5688	27.2898	26.0253	27.4
13	29.2712	24.2712	0	12	160.9	125.4	85.4	75.5	27.7	29.2	72.8	52.1	35	5.9	9.1	3.66667	8.66667	7	9	7	7	13	6	7.66667	69	445	61.7	7.8	57.357	1.0662	14.4	8.285	49.072	33.713	14.5806	19.1323	61.059	49.6456	11.4134	18.6924	97.4825	87.2652	10.2173	10.4811	34
18	30.0959	24.0959	0	12	174.5	130.8	90.8	83.7	28.5	30.1	79	55.6	37.5	6.1	10.8	10	17	11.8333	19	10.3333	11	16.5	5.83333	11.5	113	522.15	66	7.1	74.918	1.0324	28.5	21.328	53.59	40.5013	17.0692	23.432	64.6369	42.6817	21.9552	33.967	111.906	101.236	10.6702	9.53502	33.5
20	33.789	27.789	0	12	160.6	125.2	85.2	75.4	25.5	27.2	70.8	51	35.3	5.7	9.1	7.33333	11.6667	8.66667	9	4.83333	11	16.5	8	9	86	511.05	66.95	7.4	58.207	1.0388	25.7	14.98	43.227	32.5372	14.0586	18.4786	51.7453	37.9393	13.806	26.6807	99.1608	85.5434	13.6173	13.7326	27.8
